# Supplementary material
Source: publisher figshare collection journal article supplement (https://geolsoc.figshare.com/ndownloader/files/22475882)
Supplement: Supplementary file 1 [file 22475882]

## Sheet: Sheet1
	AT11																							AT15																									AT18
SiO2	38.649	38.797	39.071	38.568	38.709	38.869	38.776	39.128	38.764	38.741	38.756	38.858	39.056	39.105	39.239	38.978	38.617	38.179	38.72	38.697	39.516	39.653		38.484	38.489	38.66	38.876	38.631	38.855	38.667	38.794	38.76	38.246	38.227	38.708	38.336	39.001	38.098	38.867	38.929	38.346	39.064	38.889	38.886	38.62	38.845	39.057		38.632
TiO2	0.185	0	0	0.022	0.043	0.058	0.029	0.04	0	0	0.015	0.065	0.029	0.009	0.045	0.015	0.01	0	0.025	0.057	0	0		0	0	0.007	0.079	0	0.047	0	0.072	0	0.069	0.018	0	0.015	0	0	0	0.008	0.006	0	0.015	0.03	0	0	0.026		0.188
Al2O3	0.004	0.026	0.004	0.021	0.034	0.018	0	0.007	0.013	0.012	0.016	0	0.018	0	0	0.014	0.007	0	0.002	0	0.01	0.012		0	0	0.017	0.025	0	0	0.02	0	0.043	0	0	0	0	0.003	0	0.032	0.002	0.002	0.003	0.003	0	0.002	0	0.008		0
Cr2O3	0.011	0	0	0	0.033	0	0.021	0	0.023	0	0.02	0	0	0.009	0.004	0.022	0.01	0.002	0.008	0.013	0.002	0		0.01	0.019	0	0.072	0.003	0	0.039	0	0.003	0	0.011	0.021	0.01	0	0	0	0	0.002	0	0	0.004	0.005	0.013	0		0.062
FeO	17.827	18.08	17.74	17.975	18.23	17.848	18.283	17.965	17.453	17.785	17.806	18.14	16.948	17.645	17.881	17.866	18.036	18.043	17.958	17.686	18.286	18.207		18.828	18.896	18.749	18.438	19.03	17.698	18.419	18.405	19.814	17.829	19.185	19.261	18.188	17.877	18.72	18.393	18.538	18.485	18.322	18.838	18.689	18.724	18.69	18.674		21.232
CoO	0.008	0.021	0.017	0.01	0.049	0.092	0.067	0.037	0.028	0.031	0	0.055	0.023	0.044	0.064	0.047	0.055	0.07	0.029	0.017	0.026	0.067		0.059	0	0.027	0	0.08	0.027	0.058	0	0.058	0.076	0.023	0	0.064	0.041	0.08	0.043	0.047	0.037	0.012	0.018	0.054	0.022	0.04	0.047		0.061
NiO	0.042	0	0.084	0.061	0.058	0.078	0.063	0.083	0.038	0.053	0	0.097	0.046	0.058	0.069	0.045	0.055	0.012	0.042	0.045	0.056	0.061		0.103	0.089	0.082	0	0.028	0.055	0.047	0	0	0.127	0.087	0.05	0.058	0.073	0.041	0.098	0.044	0.041	0.1	0.04	0	0.024	0.04	0.043		0.029
MnO	0.254	0.284	0.272	0.306	0.318	0.242	0.322	0.255	0.187	0.271	0.262	0.315	0.317	0.266	0.28	0.272	0.281	0.267	0.285	0.3	0.294	0.267		0.303	0.277	0.313	0.302	0.204	0.364	0.22	0.264	0.268	0.243	0.238	0.294	0.23	0.338	0.245	0.25	0.28	0.288	0.275	0.287	0.334	0.249	0.326	0.327		0.29
MgO	42.042	41.9891	42.4438	42.2125	42.3527	42.4918	42.0489	42.5389	42.2743	42.2223	41.9577	42.04	42.4644	42.46	42.36	41.902	42.109	42.108	43.209	42.371	42.102	42.371		42.0011	42.4106	42.0215	41.5369	41.7973	41.6949	41.9074	42.2662	40.95	41.457	41.9971	41.887	41.8548	41.964	41.8324	42.1502	41.557	41.805	41.185	41.465	41.905	41.646	41.572	41.701		40.355
CaO	0.098	0.109	0.103	0.1	0.069	0.053	0.068	0.075	0.073	0.072	0.098	0.067	0.066	0.058	0.089	0.073	0.13	0.072	0.062	0.7	0.073	0.68		0.073	0.08	0.079	0.085	0.093	0.087	0.057	0.047	0.052	0.079	0.067	0.084	0.088	0.073	0.055	0.045	0.084	0.109	0.103	0.111	0.1	0.1	0.105	0.093		0.055
Total	99.154	99.3661	99.7408	99.2775	100.041	99.7678	99.7519	100.149	98.8723	99.2893	98.9417	99.656	99.0204	99.654	100.073	99.246	99.338	98.753	100.34	99.291	100.379	100.706		100.035	100.367	100.048	99.5809	99.8753	98.9129	99.5615	99.8942	99.95	98.13	99.9061	100.321	98.8798	99.401	99.0714	99.8942	99.489	99.13	99.071	99.697	100.04	99.402	99.647	99.976		101.012
Si	0.994136	0.996038	0.997947	0.991877	0.990308	0.994042	0.994631	0.99646	0.997428	0.995738	0.997876	0.9962	1.00106	0.999002	0.999244	1.00091	0.992928	0.988285	0.985045	0.988874	1.0038	0.999611		0.988169	0.984677	0.990866	0.998524	0.991992	1.00129	0.994278	0.992137	0.997045	0.995987	0.983292	0.990334	0.991825	1.00062	0.986482	0.994859	1.00039	0.990422	1.00673	0.998419	0.994574	0.994515	0.997736	0.999364		0.991383
Al(IV)	0.000121254	0.000786649	0.000120405	0.000636473	0.0010251	0.000542505	0	0.000210087	0.000394209	0.000363484	0.000485498	0	0.000543722	0	0	0.000423674	0.000212113	0	5.99626e-05	0	0.000299367	0.000356505		0	0	0.00051349	0.000756741	0	0	0.000606077	0	0.00130356	0	0	0	0	9.07083e-05	0	0.000965296	6.05696e-05	6.0878e-05	9.11146e-05	9.07689e-05	0	6.06959e-05	0	0.000241238		0
Al(VI)	0	0	0	0	0	0	0	0	0	0	0	0	0	0	0	0	0	0	0	0	0	0		0	0	0	0	0	0	0	0	0	0	0	0	0	0	0	0	0	0	0	0	0	0	0	0		0
Fe(iii)	0.00616154	0.00332392	0.00570703	0.0197173	0.0196004	0.0131101	0.0122399	0.00722695	0.00527038	0.0108657	0.00369704	0.00473434	0	0.00195809	0	0	0.0153208	0.0310655	0.0381282	0.0232999	0	0.000562798		0.0243012	0.0404077	0.0212684	0	0.0218123	0	0.0140665	0.0195571	0.0060557	0.00703105	0.0394154	0.0251179	0.0202879	0	0.0358873	0.0125765	0	0.0242329	0	0.000627353	0.00951889	0.0135158	0.00429002	3.9799e-05		0.0101064
Cr	0.000223691	0	0	0	0.000667452	0	0.000425859	0	0.000467874	0	0.000407113	0	0	0.000181771	8.05307e-05	0.000446626	0.000203276	4.09294e-05	0.000160901	0.000262636	4.01653e-05	0		0.000203001	0.00038429	0	0.00146203	6.09033e-05	0	0.000792829	0	6.10099e-05	0	0.000223693	0.000424764	0.000204539	0	0	0	0	4.08393e-05	0	0	8.0882e-05	0.000101793	0.00026398	0		0.00125786
Ti	0.00357908	0	0	0.000425545	0.000827406	0.00111563	0.000559485	0.000766168	0	0	0.000290483	0.00125335	0.000559067	0.000172929	0.000861902	0.000289705	0.000193389	0	0.000478357	0.00109555	0	0		0	0	0.000134941	0.00152615	0	0.000910969	0	0.00138494	0	0.00135148	0.000348238	0	0.000291885	0	0	0	0.000154624	0.000116558	0	0.000289647	0.000577108	0	0	0.000500369		0.00362864
Fe(ii)	0.376976	0.384647	0.37291	0.365877	0.369429	0.36794	0.379308	0.37499	0.369996	0.370851	0.379486	0.383907	0.363586	0.374878	0.380949	0.383881	0.371714	0.357961	0.342067	0.353516	0.388988	0.383203		0.378728	0.361782	0.379486	0.3963	0.385688	0.381632	0.381275	0.373073	0.419815	0.380866	0.371197	0.385651	0.372189	0.383538	0.367612	0.380478	0.398422	0.373788	0.395756	0.403753	0.389705	0.388985	0.396909	0.399503		0.444923
Mn	0.00553324	0.00617497	0.00588383	0.00666486	0.00689008	0.0052415	0.00699509	0.00549985	0.00407505	0.00589905	0.00571318	0.00683936	0.00688133	0.00575512	0.0060388	0.00591536	0.00611905	0.00585339	0.00614051	0.00649268	0.00632499	0.00570039		0.00658919	0.00600172	0.00679417	0.00656935	0.0044365	0.00794427	0.00479103	0.00571808	0.00583854	0.00535936	0.00518475	0.0063704	0.00503959	0.00734431	0.00537269	0.0054195	0.00609384	0.00629987	0.00600217	0.00624032	0.00723484	0.00543046	0.00709148	0.00708617		0.00630276
Mg	1.61219	1.60709	1.61619	1.61844	1.61534	1.62006	1.60797	1.61504	1.62164	1.61786	1.61055	1.60677	1.62265	1.61711	1.60818	1.60411	1.61413	1.62498	1.63878	1.6142	1.59441	1.59239		1.60781	1.61754	1.60565	1.59051	1.60009	1.60185	1.60651	1.61148	1.5704	1.6095	1.61049	1.59766	1.61435	1.60508	1.61482	1.60844	1.59208	1.60973	1.58234	1.58706	1.59784	1.59881	1.59187	1.59073		1.54389
Ca	0.00270057	0.00299796	0.00281846	0.0027552	0.00189117	0.00145211	0.00186866	0.00204623	0.00201232	0.00198257	0.00270325	0.00184019	0.00181234	0.00158739	0.00242809	0.00200825	0.003581	0.0019967	0.0016898	0.0191639	0.00198664	0.0183648		0.00200815	0.00219265	0.00216921	0.00233893	0.00255845	0.0024019	0.00157023	0.00128774	0.00143303	0.00220403	0.00184633	0.00230241	0.00243912	0.00200651	0.00152571	0.001234	0.00231257	0.00301612	0.00284378	0.00305303	0.0027401	0.0027588	0.0028893	0.00254935		0.00151209
Total	3.00202	3.00109	3.00187	3.00646	3.00598	3.0043	3.004	3.00237	3.00173	3.00356	3.00121	3.00155	2.99709	3.00064	2.99778	2.99798	3.0044	3.01018	3.01255	3.0069	2.99585	3.00018		3.00791	3.01319	3.00693	2.99802	3.00709	2.99769	3.00459	3.00639	3.00195	3.0023	3.01199	3.00816	3.00663	2.99991	3.0117	3.0041	2.9995	3.00771	2.99377	2.99953	3.00228	3.00418	3.00105	3.00001		3.003
Endmembers
Fo	80.5629	80.2984	80.7707	80.4533	80.2767	80.7214	80.1136	80.6269	81.0322	80.6513	80.5427	80.239	81.4267	80.8638	80.6115	80.461	80.3839	80.3897	80.8501	80.7661	80.1554	80.3473		79.6476	79.7693	79.7138	79.8017	79.4823	80.4481	80.0318	80.1417	78.4246	80.3506	79.4001	79.2454	80.2017	80.4169	79.7241	80.1202	79.7427	79.8771	79.7883	79.4438	79.7018	79.6449	79.5785	79.6416		76.9714
Fa	19.1606	19.3931	18.9353	19.2154	19.3809	19.0174	19.5379	19.0985	18.7642	19.0547	19.1716	19.4195	18.228	18.8484	19.0858	19.2423	19.3114	19.3207	18.847	18.909	19.5266	19.3651		20.026	19.9347	19.9489	19.8687	20.2974	19.1529	19.7295	19.574	21.2838	19.3819	20.3442	20.4386	19.548	19.2151	20.0107	19.6098	19.9521	19.8103	19.9091	20.2438	19.9373	20.0845	20.067	20.0036		22.7144
Tp	0.276503	0.308534	0.294051	0.331312	0.342413	0.261164	0.348515	0.274567	0.203628	0.294071	0.285713	0.341544	0.345315	0.287786	0.3027	0.296711	0.304729	0.289575	0.302946	0.32486	0.317974	0.287626		0.326414	0.295975	0.337303	0.329608	0.220377	0.398977	0.238676	0.284369	0.291573	0.267554	0.255618	0.315977	0.250369	0.36796	0.265251	0.269958	0.305224	0.312608	0.302654	0.312374	0.36088	0.270519	0.354508	0.354777		0.314227
[truncated: 149 more columns]
